# Supplementary material
Source: Elsevier journal article supplement (https://www.sciencedirect.com/science/article/pii/S1138359320302240)
Supplement: mmc1 [file S1138359320302240:mmc1.pdf]

## ANEXOS

**Tabla 1. Criterios de Búsqueda en Cochrane DataBASE**

|    |                                                                                                                                                                                                                                                                                                                                                                                                                                                                                                                                                                                                                                                                                                                                                                                                         |      |
|----|---------------------------------------------------------------------------------------------------------------------------------------------------------------------------------------------------------------------------------------------------------------------------------------------------------------------------------------------------------------------------------------------------------------------------------------------------------------------------------------------------------------------------------------------------------------------------------------------------------------------------------------------------------------------------------------------------------------------------------------------------------------------------------------------------------|------|
| #1 | "COVID-19" OR (COVID) OR (Coronavirus) OR (SARS-CoV-2) OR (Coronaviruses) OR (Deltacoronavirus) OR (Deltacoronaviruses) OR "Munia coronavirus HKU13" OR (Coronavirus HKU15) OR (Coronavirus, Rabbit) OR (Rabbit Coronavirus) OR (Coronaviruses, Rabbit) OR (Rabbit Coronaviruses) OR "Bulbul coronavirus HKU11" OR "Thrush coronavirus HKU12"                                                                                                                                                                                                                                                                                                                                                                                                                                                           | 161  |
| #2 | (Hydroxychloroquine) OR (Oxychlorochin) OR (Oxychloroquine) OR (Hydroxychlorochin) OR (Plaquenil) OR (Hydroxychloroquine Sulfate) OR "Hydroxychloroquine Sulfate (1:1) Salt" OR (Hidroxiclороquina) OR (Hydroxychloroquine) OR (Hydroxychloroquinum) OR (Oxichlorochine) OR (Oxichloroquine) OR Chlorochin OR Cloroquina OR Cloroquine OR Chloroquine OR (Antimalarials) OR (Antimalarial Agents) OR (Agents, Antimalarial) OR (Antimalarial Drugs) OR (Drugs, Antimalarial) OR (Anti-Malarials) OR (Anti Malarials) OR "(N4-(7-Chloro-4-quinoliny)-N1,N1-diethyl-1,4-pentanediamine)" OR Hydroquin OR Axemal OR Dolquine OR Quensyl OR Quinoric OR Plaquenil OR chloraquin OR chloraquine OR chloroquine OR cloroquin OR chlorokin OR chlorokine OR chlorquin OR chlorquine OR kloroquin OR kloroquine | 3993 |
| #3 | #1 AND #2                                                                                                                                                                                                                                                                                                                                                                                                                                                                                                                                                                                                                                                                                                                                                                                               | 8    |

**Tabla 2 Criterios de Búsqueda en PubMed**

|    |                                                                                                                                                                                                                                                                                                                                                                                                                                                                                                                                                                                                                                                                                                                                                                                                                                                                                                                                                                                                                                                                                                                            |       |
|----|----------------------------------------------------------------------------------------------------------------------------------------------------------------------------------------------------------------------------------------------------------------------------------------------------------------------------------------------------------------------------------------------------------------------------------------------------------------------------------------------------------------------------------------------------------------------------------------------------------------------------------------------------------------------------------------------------------------------------------------------------------------------------------------------------------------------------------------------------------------------------------------------------------------------------------------------------------------------------------------------------------------------------------------------------------------------------------------------------------------------------|-------|
| #2 | ,"Search ("Hydroxychloroquine"[Mesh] OR (Hydroxychloroquine) OR (Oxychlorochin) OR (Oxychloroquine) OR (Hydroxychlorochin) OR (Plaquenil) OR (Hydroxychloroquine Sulfate) OR "Hydroxychloroquine Sulfate (1:1) Salt" OR (Hidroxiclороquina) OR (Hydroxychloroquine) OR (Hydroxychloroquinum) OR (Oxichlorochine) OR (Oxichloroquine) OR "Chloroquine"[Mesh] OR Chlorochin OR Cloroquina OR Cloroquine OR Chloroquine OR "Antimalarials"[Mesh] OR (Antimalarials) OR (Antimalarial Agents) OR (Agents, Antimalarial) OR (Antimalarial Drugs) OR (Drugs, Antimalarial) OR (Anti-Malarials) OR (Anti Malarials) OR "N4-(7-Chloro-4-quinoliny)-N1,N1-diethyl-1,4-pentanediamine)" OR Hydroquin OR Axemal OR Dolquine OR Quensyl OR Quinoric)"                                                                                                                                                                                                                                                                                                                                                                                  | 95714 |
| #1 | ,"Search "Coronavirus"[Mesh] OR "COVID-19" OR (COVID) OR (Coronavirus) OR (SARS-CoV-2) OR (Coronaviruses) OR (Deltacoronavirus) OR (Deltacoronaviruses) OR "Munia coronavirus HKU13" OR (Coronavirus HKU15) OR (Coronavirus, Rabbit) OR (Rabbit Coronavirus) OR (Coronaviruses, Rabbit) OR (Rabbit Coronaviruses) OR "Bulbul coronavirus HKU11" OR "Thrush coronavirus HKU12")"                                                                                                                                                                                                                                                                                                                                                                                                                                                                                                                                                                                                                                                                                                                                            | 20371 |
| #3 | "Search (((("Hydroxychloroquine"[Mesh] OR (Hydroxychloroquine) OR (Oxychlorochin) OR (Oxychloroquine) OR (Hydroxychlorochin) OR (Plaquenil) OR (Hydroxychloroquine Sulfate) OR "Hydroxychloroquine Sulfate (1:1) Salt" OR (Hidroxiclороquina) OR (Hydroxychloroquine) OR (Hydroxychloroquinum) OR (Oxichlorochine) OR (Oxichloroquine) OR "Chloroquine"[Mesh] OR Chlorochin OR Cloroquina OR Cloroquine OR Chloroquine OR "Antimalarials"[Mesh] OR (Antimalarials) OR (Antimalarial Agents) OR (Agents, Antimalarial) OR (Antimalarial Drugs) OR (Drugs, Antimalarial) OR (Anti-Malarials) OR (Anti Malarials) OR "N4-(7-Chloro-4-quinoliny)-N1,N1-diethyl-1,4-pentanediamine)" OR Hydroquin OR Axemal OR Dolquine OR Quensyl OR Quinoric))) AND ("Coronavirus"[Mesh] OR "COVID-19" OR (COVID) OR (Coronavirus) OR (SARS-CoV-2) OR (Coronaviruses) OR (Deltacoronavirus) OR (Deltacoronaviruses) OR "Munia coronavirus HKU13" OR (Coronavirus HKU15) OR (Coronavirus, Rabbit) OR (Rabbit Coronavirus) OR (Coronaviruses, Rabbit) OR (Rabbit Coronaviruses) OR "Bulbul coronavirus HKU11" OR "Thrush coronavirus HKU12")))" | 144   |

**Tabla 3 Resultados de búsqueda en cochrane database**

1. Efficacy and Safety of Hydroxychloroquine for Treatment of Pneumonia Caused by 2019-nCoV ( HC-nCoV ) NCT04261517 <https://clinicaltrials.gov/show/NCT04261517>, 2020 | added to CENTRAL: 29 February 2020 | 2020 Issue 02
2. Post-exposure Prophylaxis for SARS-Coronavirus-2 NCT04308668 <https://clinicaltrials.gov/show/NCT04308668>, 2020 | added to CENTRAL: 31 March 2020 | 2020 Issue 03 EN SANITARIOS Y SUS CONTACTOS
3. Various Combination of Protease Inhibitors, Oseltamivir, Favipiravir, and Chloroquin for Treatment of COVID19 : a Randomized Control Trial NCT04303299 <https://clinicaltrials.gov/show/NCT04303299>, 2020 | added to CENTRAL: 31 March 2020 | 2020 Issue 03 EN ASOCIACIÓN CON FÁRMACOS QUE NO SON AZITROMICINA
4. The Clinical Study of Carrimycin on Treatment Patients With COVID-19 NCT04286503 <https://clinicaltrials.gov/show/NCT04286503>, 2020 | added to CENTRAL: 31 March 2020 | 2020 Issue 03 EXCLUIDO NO CLOROQUINA
5. Treatment of Mild Cases and Chemoprophylaxis of Contacts as Prevention of the COVID-19 Epidemic NCT04304053 <https://clinicaltrials.gov/show/NCT04304053>, 2020 | added to CENTRAL: 31 March 2020 | 2020 Issue 03 EN POBLACIÓN GENERAL EN SÍNTOMAS LEVES Y PROFILAXIS POSTEXPOSICIÓN
6. Chloroquine Prevention of Coronavirus Disease (COVID-19) in the Healthcare Setting NCT04303507 <https://clinicaltrials.gov/show/NCT04303507>, 2020 | added to CENTRAL: 31 March 2020 | 2020 Issue 03 PROFILAXIS POSTEXPOSICIÓN DURANTE 3 MESES.
7. Comparison of Lopinavir/Ritonavir or Hydroxychloroquine in Patients With Mild Coronavirus Disease (COVID-19) NCT04307693 <https://clinicaltrials.gov/show/NCT04307693>, 2020 | added to CENTRAL: 31 March 2020 | 2020 Issue 03
8. Comparison of Lopinavir/Ritonavir or Hydroxychloroquine in Patients With Mild Coronavirus Disease (COVID-19) NCT043076931 <https://clinicaltrials.gov/show/NCT04307693>, 2020 | added to CENTRAL: 31 March 2020 | 2020 Issue 03 DUPLICADO

**Tabla 4: EC con Hidroxicloroquina en ensayos clínicos**

| Active Substance      | Hydroxychloroquine                                                      | Hydroxychloroquine Sulfate (Plaquenil®)                                     | Hydroxychloroquine + Azithromycin                     | Hydroxychloroquine (Plaquenil®)                                            |
|-----------------------|-------------------------------------------------------------------------|-----------------------------------------------------------------------------|-------------------------------------------------------|----------------------------------------------------------------------------|
| Sponsor               | National Institute of Respiratory Diseases, Mexico; Sanofi              | University Hospital, Akershus, Norway                                       | Hospital Israelita Albert Einstein, São Paulo, Brazil | University of Minnesota, USA                                               |
| Trial identifier      | NCT04315896                                                             | NCT04316377                                                                 | NCT04321278                                           | NCT04308668                                                                |
| Study desing          | Randomised, parallel assigned, double-blinded, placebo-controlled study | Pragmatic randomised parallel assigned open-label, placebo-controlled study | Randomised, parallel assigned, open-label study       | Randomised, parallel assigned, quadruple-blinded, placebo-controlled study |
| Status trial          | Not yet recruiting                                                      | Not yet recruiting                                                          | recruiting                                            | recruiting                                                                 |
| Duration/End of study | 7 months/ Estimated October 31, 2020                                    | 12 months/ Estimated April 1, 2021                                          | 5 months/ Estimated August 30, 2020                   | 1 month/ Estimated April 21, 2020                                          |

**Tabla 5 Resultados de la búsqueda en pubmed**

## SYSTEMATIC REVIEW

- Shah S, Das S, Jain A, Misra DP, Negi VS. A systematic review of the prophylactic role of chloroquine and hydroxychloroquine in Coronavirus Disease-19 (COVID-19). *Int J Rheum Dis*. 2020 Apr 13. doi: 10.1111/1756-185X.13842. [Epub ahead of print] PubMed PMID: 32281213.
- Cortegiani A, Ingoglia G, Ippolito M, Giarratano A, Einav S. A systematic review on the efficacy and safety of chloroquine for the treatment of COVID-19. *J Crit Care*. 2020 Mar 10. pii: S0883-9441(20)30390-7. doi:10.1016/j.jcrc.2020.03.005. [Epub ahead of print] PubMed PMID: 32173110.

## ESTUDIOS QUE LO ASOCIAN CON AZITROMICINA

- Gautret P, Lagier JC, Parola P, Hoang VT, Meddeb L, Sevestre J, Mailhe M, Doudier B, Aubry C, Amrane S, Seng P, Hocquart M, Eldin C, Finance J, Vieira VE, Dupont HT, Honoré S, Stein A, Million M, Colson P, La Scola B, Veit V, Jacquier A, Deharo JC, Drancourt M, Fournier PE, Rolain JM, Brouqui P, Raoult D. Clinical and microbiological effect of a combination of hydroxychloroquine and azithromycin in 80 COVID-19 patients with at least a six-day follow up: A pilot observational study. *Travel Med Infect Dis*. 2020 Apr 11:101663. doi: 10.1016/j.tmaid.2020.101663. [Epub ahead of print] PubMed PMID: 32289548.
- Garcia-Cremades M, Solans BP, Hughes E, Ernest JP, Wallender E, Aweeka F, Luetkemeyer A, Savic RM. Optimizing hydroxychloroquine dosing for patients with COVID-19: An integrative modeling approach for effective drug repurposing. *Clin Pharmacol Ther*. 2020 Apr 14. doi: 10.1002/cpt.1856. [Epub ahead of print] PubMed PMID: 32285930
- Boyarisky BJ, Chiang TP, Werbel WA, Durand CM, Avery RK, Getsin SN, Jackson KR, Kernodle AB, Van Pilsum Rasmussen SE, Massie AB, Segev DL, Garonzik-Wang JM. Early Impact of COVID-19 on Transplant Center Practices and Policies in the United States. *Am J Transplant*. 2020 Apr 13. doi: 10.1111/ajt.15915. [Epub ahead of print] PubMed PMID: 32282982
- Juurlink DN. Safety considerations with chloroquine, hydroxychloroquine and azithromycin in the management of SARS-CoV-2 infection. *CMAJ*. 2020 Apr 8. pii: cmaj.200528. doi: 10.1503/cmaj.200528. [Epub ahead of print] PubMed PMID: 32269021.
- Ohe M, Shida H, Jodo S, Kusunoki Y, Seki M, Furuya K, Goudarzi H. Macrolide treatment for COVID-19: Will this be the way forward? *Biosci Trends*. 2020 Apr 5. doi: 10.5582/bst.2020.03058. [Epub ahead of print] PubMed PMID: 32249257.
- Sargiacomo C, Sotgia F, Lisanti MP. COVID-19 and chronological aging: senolytics and other anti-aging drugs for the treatment or prevention of corona virus infection? *Aging (Albany NY)*. 2020 Mar 30. doi: 10.18632/aging.103001. [Epub ahead of print] PubMed PMID: 32229706.
- Gautret P, Lagier JC, Parola P, Hoang VT, Meddeb L, Mailhe M, Doudier B, Courjon J, Giordanengo V, Vieira VE, Dupont HT, Honoré S, Colson P, Chabrière E, La Scola B, Rolain JM, Brouqui P, Raoult D. Hydroxychloroquine and azithromycin as a treatment of COVID-19: results of an open-label non-randomized clinical trial. *Int J Antimicrob Agents*. 2020 Mar 20:105949. doi: 10.1016/j.ijantimicag.2020.105949. [Epub ahead of print] PubMed PMID: 32205204; PubMed Central PMCID: PMC7102549.

**Tabla 6 Informes encontrados en Agencias de Evaluación:**

AIHTA Policy Letter No.: 002; 2020 Viena: HTA Austria - Austrian Institute for Health Technology Assessment GmbH.

**Tabla 7: La cloroquina en el registro de ensayos clínicos EUDRA-CT**

| Active Substance      | Chloroquine Phosphate                                                                                                                                                                                                          | Chloroquine Phosphate                                                                                                                                                                                              | Chloroquine Phosphate                                                                                                                                                                                                  | Chloroquine Phosphate                                                                                                                                                                                                                                                                                                                                                                                                                                                                           |
|-----------------------|--------------------------------------------------------------------------------------------------------------------------------------------------------------------------------------------------------------------------------|--------------------------------------------------------------------------------------------------------------------------------------------------------------------------------------------------------------------|------------------------------------------------------------------------------------------------------------------------------------------------------------------------------------------------------------------------|-------------------------------------------------------------------------------------------------------------------------------------------------------------------------------------------------------------------------------------------------------------------------------------------------------------------------------------------------------------------------------------------------------------------------------------------------------------------------------------------------|
| Sponsor               | HwaMei Hospital, University of Chinese Academy of Sciences, Zhejiang, China                                                                                                                                                    | HwaMei Hospital, University of Chinese Academy of Sciences, Zhejiang, China                                                                                                                                        | Zhongnan Hospital of Wuhan University, Wuhan, China                                                                                                                                                                    | The First Hospital of Jilin University, Jilin, China                                                                                                                                                                                                                                                                                                                                                                                                                                            |
| Trial identifier      | ChiCTR2000029939                                                                                                                                                                                                               | ChiCTR2000029935                                                                                                                                                                                                   | ChiCTR2000029988                                                                                                                                                                                                       | ChiCTR2000029975                                                                                                                                                                                                                                                                                                                                                                                                                                                                                |
| Study desing          | Randomised, parallell assigned, single-blinded study                                                                                                                                                                           | Single arm, open-label, case series study                                                                                                                                                                          | Randomised, parallell assigned, open-label study                                                                                                                                                                       | Single-arm, open-label study                                                                                                                                                                                                                                                                                                                                                                                                                                                                    |
| Status trial          | Recruiting                                                                                                                                                                                                                     | Recruiting                                                                                                                                                                                                         | Recruiting                                                                                                                                                                                                             | Not yet recruiting                                                                                                                                                                                                                                                                                                                                                                                                                                                                              |
| Duration/End of study | 12 months/ Estimated February 6, 2021                                                                                                                                                                                          | 12 months/ Estimated February 6, 2021                                                                                                                                                                              | 3 months/ Estimated May 31, 2020                                                                                                                                                                                       | 3 months/ Estimated May 31, 2020                                                                                                                                                                                                                                                                                                                                                                                                                                                                |
| Study details         | <p>Pts: n = 100</p> <p>Location: China</p> <p>Intervention: Chloroquine Phosphate (not specified) Control: Standard of care</p> <p>Duration of observation: up to 30 days</p> <p>Primary outcome: Length of hospital stay.</p> | <p>Pts: n = 100</p> <p>Location: China</p> <p>Intervention: Chloroquine Phosphate (not specified) Control: none</p> <p>Duration of observation: up to 30 days</p> <p>Primary outcome: Length of hospital stay.</p> | <p>Pts: n = 80</p> <p>Location: China</p> <p>Intervention: Chloroquine Phosphate (not specified) Control: no treatment</p> <p>Duration of observation: not given</p> <p>Primary outcome: Time to clinical recovery</p> | <p>Pts: n = 10</p> <p>Location: China</p> <p>Intervention: Chloroquine (150 mg dissolved in 5 ml of normal saline, q12h, inhaled by atomization for one week)</p> <p>Control: none</p> <p>Duration of observation: up to 30 days</p> <p>Primary outcome:</p> <ul style="list-style-type: none"> <li>- Viral negative-transforming time</li> <li>- 30-day cause-specific mortality</li> <li>- Co-infections</li> <li>- Time from severe and critical patients to clinical improvement</li> </ul> |

## . Continuación de la tabla.

| Active Substance      | Chloroquin Phosphate vs. Hydroxychloroquine Sulfate                                                                                                                                                                                                                                                                                                                                                            | Chloroquin Phosphate vs. Hydroxychloroquine Sulfate                                                                                                                                                                                                                                                                                                                                                            | Chloroquin Phosphate vs. Hydroxychloroquine Sulfate                                                                                                                                                                                                                                                                                                                                                                                                                                                       |
|-----------------------|----------------------------------------------------------------------------------------------------------------------------------------------------------------------------------------------------------------------------------------------------------------------------------------------------------------------------------------------------------------------------------------------------------------|----------------------------------------------------------------------------------------------------------------------------------------------------------------------------------------------------------------------------------------------------------------------------------------------------------------------------------------------------------------------------------------------------------------|-----------------------------------------------------------------------------------------------------------------------------------------------------------------------------------------------------------------------------------------------------------------------------------------------------------------------------------------------------------------------------------------------------------------------------------------------------------------------------------------------------------|
| Sponsor               | Zhongshan Hospital Affiliated to Xiamen University, China                                                                                                                                                                                                                                                                                                                                                      | Zhongshan Hospital Affiliated to Xiamen University, China                                                                                                                                                                                                                                                                                                                                                      | Peking University Third Hospital, China                                                                                                                                                                                                                                                                                                                                                                                                                                                                   |
| Trial identifier      | ChiCTR2000030054                                                                                                                                                                                                                                                                                                                                                                                               | ChiCTR2000029992                                                                                                                                                                                                                                                                                                                                                                                               | ChiCTR2000029899                                                                                                                                                                                                                                                                                                                                                                                                                                                                                          |
| Study desing          | Randomised, parallel assigned, open-label, placebo-controlled study                                                                                                                                                                                                                                                                                                                                            | Randomised, parallel assigned, open-label, placebo-controlled study                                                                                                                                                                                                                                                                                                                                            | Randomised, parallel assigned, open-label study                                                                                                                                                                                                                                                                                                                                                                                                                                                           |
| Status trial          | Not yet recruiting                                                                                                                                                                                                                                                                                                                                                                                             | Not yet recruiting                                                                                                                                                                                                                                                                                                                                                                                             | Recruiting                                                                                                                                                                                                                                                                                                                                                                                                                                                                                                |
| Duration/End of study | 3 months/ Estimated May 21, 2020                                                                                                                                                                                                                                                                                                                                                                               | 3 months/ Estimated May 20, 2020                                                                                                                                                                                                                                                                                                                                                                               | 2 months/ Estimated April 30, 2020                                                                                                                                                                                                                                                                                                                                                                                                                                                                        |
| Study details         | <p>Pts: n = 100</p> <p>Location: China</p> <p>Intervention:</p> <ul style="list-style-type: none"> <li>- Group 1: Hydroxychloroquine Sulfate (0.2 g bid x14 days/day)</li> <li>- Group 2: Chloroquine Phosphate (first dose 1 g x2 days, third day 0.5 g x12 days)</li> </ul> <p>Control: Placebo oral tablet</p> <p>Duration of observation: up to 28 days</p> <p>Primary outcome: Clinical recovery time</p> | <p>Pts: n = 100</p> <p>Location: China</p> <p>Intervention:</p> <ul style="list-style-type: none"> <li>- Group 1: Chloroquine Phosphate (first dose 1 g x2 days, third day 0.5 g x12 days)</li> <li>- Group 2: Hydroxychloroquine Sulfate (0.2 g bid x14 days/day)</li> </ul> <p>Control: Placebo oral tablet</p> <p>Duration of observation: up to 28 days</p> <p>Primary outcome: Clinical recovery time</p> | <p>Pts: n = 100</p> <p>Location: China</p> <p>Intervention:</p> <ul style="list-style-type: none"> <li>- Group 1: Hydroxychloroquine Sulfate (Day1: first dose: 6 tablets (0.1 g/tablet), second dose: 6 tablets (0.1 g/tablet) after 6h; Day2~5: 2 tablets (0.1 g/tablet), BID)</li> <li>- Group 2: Chloroquine Phosphate (Day 1-3: 500 mg BID; Day 4- 5: 250 mg BID)</li> </ul> <p>Control: none</p> <p>Duration of observation: up to 28 days</p> <p>Primary outcome: Time to Clinical Improvement</p> |

|               |                                                           |                                                                                                                                     |                                                                                                                                                                                                                  |                                                                                                                                                                                                                                                                                                                                              |
|---------------|-----------------------------------------------------------|-------------------------------------------------------------------------------------------------------------------------------------|------------------------------------------------------------------------------------------------------------------------------------------------------------------------------------------------------------------|----------------------------------------------------------------------------------------------------------------------------------------------------------------------------------------------------------------------------------------------------------------------------------------------------------------------------------------------|
| Study details | Pts: = 500                                                | Pts: n = 202                                                                                                                        | Pts: n = 440                                                                                                                                                                                                     | Pts: n = 3,000                                                                                                                                                                                                                                                                                                                               |
|               | Location: Mexico                                          | Location: Norway                                                                                                                    | Location: Brazil                                                                                                                                                                                                 | Location: USA                                                                                                                                                                                                                                                                                                                                |
|               | Intervention: Hydroxychloroquine (400 mg/day for 10 days) | Intervention: Hydroxychloroquine sulfate (400 mg)                                                                                   | Intervention: Hydroxychloroquine (400 mg 2x/day, 12/12h for 10 days) + Azithromycin (500 mg 1x/day for 10 days)                                                                                                  | Intervention: Hydroxychloroquine (200 mg tablet; 800 mg orally once, followed in 6 to 8 hours by 600 mg, then 600 mg once a day for 4 consecutive days)                                                                                                                                                                                      |
|               | Control: Placebo oral tablet                              | Control: Placebo oral tablet                                                                                                        | Control: Hydroxychloroquine (400 mg 2x/day, 12/12h for 10 days)                                                                                                                                                  | Control: Placebo oral tablet                                                                                                                                                                                                                                                                                                                 |
|               | Duration of observation: up to 120 days                   | Duration of observation: up to 90 days                                                                                              | Duration of observation: up to 29 days                                                                                                                                                                           | Duration of observation: up to 14 days                                                                                                                                                                                                                                                                                                       |
|               | Primary outcome: Incidence of all-cause mortality         | Primary outcome: Rate of decline in SARS-CoV-2 viral load assessed by real time polymerase chain reaction in nasopharyngeal samples | Primary outcome: Evaluation of the clinical status of patients on the 15 <sup>th</sup> day after randomisation defined by the ordinal scale of 7 points (score ranges from 1 to 7, with 7 being the worst score) | Primary outcome: - Number of participants at 14 days post enrollment with active COVID-19 disease<br>- Ordinal Scale of COVID-19 Disease Severity at 14 days among those who are symptomatic at trial entry:<br>1) no COVID-19 illness;<br>2) COVID-19 illness with no hospitalization;<br>3) COVID-19 illness with hospitalization or death |

## Continuación de la tabla.

| Active Substance      | Hydroxychloroquine vs. Remdesivir vs. Lopinavir/Ritonavir vs. Lopinavir/Ritonavir + Interferon Beta-1A                                                                                                                                                                                                                                                                                                                                                                                                                                                                                                 | Hydroxychloroquine (Plaquenil®)                                                                                                                                                                                              | Hydroxychloroquine (Quensyl®)                                                                                                                                                                                                                                                                                                                                                         | Hydroxychloroquine (Plaquenil®)                                                                                                                                                                                                                                                          |
|-----------------------|--------------------------------------------------------------------------------------------------------------------------------------------------------------------------------------------------------------------------------------------------------------------------------------------------------------------------------------------------------------------------------------------------------------------------------------------------------------------------------------------------------------------------------------------------------------------------------------------------------|------------------------------------------------------------------------------------------------------------------------------------------------------------------------------------------------------------------------------|---------------------------------------------------------------------------------------------------------------------------------------------------------------------------------------------------------------------------------------------------------------------------------------------------------------------------------------------------------------------------------------|------------------------------------------------------------------------------------------------------------------------------------------------------------------------------------------------------------------------------------------------------------------------------------------|
| Sponsor               | Institut National de la Santé Et de la Recherche Médicale, France                                                                                                                                                                                                                                                                                                                                                                                                                                                                                                                                      | Oslo University Hospital, Norway                                                                                                                                                                                             | Universitätsklinikum Tübingen, Germany                                                                                                                                                                                                                                                                                                                                                | Fondation Méditerranée Infection - IHU , Méditerranée Infection, France                                                                                                                                                                                                                  |
| Trial identifier      | NCT04315948 (Part of global WHO SOLIDARTY trial)                                                                                                                                                                                                                                                                                                                                                                                                                                                                                                                                                       | EudraCT: 2020-000982-18 (Part of global WHO SOLIDARTY trial)                                                                                                                                                                 | EudraCT: 2020-001224-33                                                                                                                                                                                                                                                                                                                                                               | EudraCT 2020-000890-25                                                                                                                                                                                                                                                                   |
| Study desing          | Multicenter, randomised, parallél assigned, open-label study                                                                                                                                                                                                                                                                                                                                                                                                                                                                                                                                           | Multicenter, randomised, parallél assigned, open-label study                                                                                                                                                                 | Randomised, parallél assigned, double-blinded, placebo-controlled study                                                                                                                                                                                                                                                                                                               | Single-arm, not blinded study                                                                                                                                                                                                                                                            |
| Status trial          | Recruiting                                                                                                                                                                                                                                                                                                                                                                                                                                                                                                                                                                                             | Ongoing                                                                                                                                                                                                                      | Ongoing                                                                                                                                                                                                                                                                                                                                                                               | Ongoing                                                                                                                                                                                                                                                                                  |
| Duration/End of study | 36 months/ Estimated March 2023                                                                                                                                                                                                                                                                                                                                                                                                                                                                                                                                                                        | 12 months/ not specified                                                                                                                                                                                                     | 18 months/ A interim analysis will be done when 40% of events have accrued. In case the interim analysis shows a HR > 1.93 (nominal p < 0.0018), efficacy is shown and the trial may be stopped. Final analysis upon completion of the trial and final database lock                                                                                                                  | 12 months /not specified                                                                                                                                                                                                                                                                 |
| Study details         | <p>Pts: n = 3,100</p> <p>Location: France</p> <p>Intervention:</p> <ul style="list-style-type: none"> <li>- Group 1: Remdesivir (200 mg i.v. Day 1, followed by 100 mg once-daily i.v. for duration of hospitalization up to 10 days)</li> <li>- Group 2: Lopinavir/ritonavir (400 mg/lopinavir/100 mg ritonavir every 12 h for 14 days tablet form. Patients who are unable to take medications by mouth, 400 mg lopinavir/100 mg ritonavir 5-ml suspension every 12 h for 14 days via nasogastric tube)</li> <li>- Group 3: Lopinavir/ritonavir + Interferon β-1a 400 mg lopinavir/100 mg</li> </ul> | <p>Pts: n = 443</p> <p>Location: Norway</p> <p>Intervention: Hydroxychloroquine (not specified)</p> <p>Control: Standard of care</p> <p>Duration of observation: not given</p> <p>Primary outcome: In-hospital mortality</p> | <p>Pts: n=220</p> <p>Location: Germany</p> <p>Intervention: Hydroxychloroquine (not specified)</p> <p>Control: Placebo oral tablet</p> <p>Duration of observation: not given</p> <p>Primary outcome: Viral clearance defined as time to sustained SARS-CoV-2-specific RNA copy number ≤100, measured by real time reverse-transcription polymerase chain reaction in throat swabs</p> | <p>Pts: n = 25</p> <p>Location: France</p> <p>Intervention: Hydroxychloroquine (not specified)</p> <p>Control: none</p> <p>Duration of observation: at timepoints day 1, day 4, day 7 and day 14</p> <p>Primary outcome: Results of SARS-CoV2 virus detection, not further specified</p> |

|  |                                                                                                                                                                                                                                                                                                                                                                                                                                                                                                                                                                                                                                                                                                                                                                                                                                                                                                                                                                                                                                                                                                                                                  |  |  |  |
|--|--------------------------------------------------------------------------------------------------------------------------------------------------------------------------------------------------------------------------------------------------------------------------------------------------------------------------------------------------------------------------------------------------------------------------------------------------------------------------------------------------------------------------------------------------------------------------------------------------------------------------------------------------------------------------------------------------------------------------------------------------------------------------------------------------------------------------------------------------------------------------------------------------------------------------------------------------------------------------------------------------------------------------------------------------------------------------------------------------------------------------------------------------|--|--|--|
|  | <p>ritonavir every 12 h for 14 days in tablet form. Patients who are unable to take medications by mouth 400 mg lopinavir/100 mg ritonavir 5-ml suspension every 12 h for 14 days nasogastric tube. Interferon <math>\beta</math>-1a subcutaneously at the dose of 44 <math>\mu</math>g for a total of 3 doses in 6 days (day 1, day 3, day 6))</p> <p>- Group 4: Hydroxychloroquine Sulfate (400 mg twice day 1, followed by 400 mg once daily for 9 days. Through nasogastric tube: 600 mg twice day 1, followed by a maintenance dose of 400 mg)</p> <p>Control: Standard of care</p> <p>Duration of observation: 15 days</p> <p>Primary outcome: Percentage of subjects reporting each severity rating on a 7-point ordinal scale:</p> <p>1) Not hospitalized, no limitations on activities</p> <p>2) Not hospitalized, limitation on activities;</p> <p>3) Hospitalized, not requiring supplemental oxygen;</p> <p>4) Hospitalized, requiring supplemental oxygen;</p> <p>6) Hospitalized, on non-invasive ventilation or high flow oxygen devices;</p> <p>7) Hospitalized, on invasive mechanical ventilation or ECMO;</p> <p>8) Death</p> |  |  |  |
|--|--------------------------------------------------------------------------------------------------------------------------------------------------------------------------------------------------------------------------------------------------------------------------------------------------------------------------------------------------------------------------------------------------------------------------------------------------------------------------------------------------------------------------------------------------------------------------------------------------------------------------------------------------------------------------------------------------------------------------------------------------------------------------------------------------------------------------------------------------------------------------------------------------------------------------------------------------------------------------------------------------------------------------------------------------------------------------------------------------------------------------------------------------|--|--|--|

## Continuación de la tabla.

| Active Substance      | Hydroxychloroquine Sulfate vs. Chloroquin Phosphate                                                                                                                                                                                                                                                                                 | Hydroxychloroquine (Plaquenil®)                                                                                                                                                                                                                                                                                                                  | Chloroquin Phosphate vs. Hydroxychloroquine Sulfate                                                                                                                                                                                                                                                                                 | Hydroxychloroquine Sulfate vs. Chloroquin Phosphate                                                                                                                                                                                                                                                                                                                                                                      |
|-----------------------|-------------------------------------------------------------------------------------------------------------------------------------------------------------------------------------------------------------------------------------------------------------------------------------------------------------------------------------|--------------------------------------------------------------------------------------------------------------------------------------------------------------------------------------------------------------------------------------------------------------------------------------------------------------------------------------------------|-------------------------------------------------------------------------------------------------------------------------------------------------------------------------------------------------------------------------------------------------------------------------------------------------------------------------------------|--------------------------------------------------------------------------------------------------------------------------------------------------------------------------------------------------------------------------------------------------------------------------------------------------------------------------------------------------------------------------------------------------------------------------|
| Sponsor               | Zhongshan Hospital Affiliated to Xiamen University, China                                                                                                                                                                                                                                                                           | Renmin Hospital of Wuhan University, China                                                                                                                                                                                                                                                                                                       | Zhongshan Hospital Affiliated to Xiamen University, China                                                                                                                                                                                                                                                                           | Peking University Third Hospital, China                                                                                                                                                                                                                                                                                                                                                                                  |
| Trial identifier      | ChiCTR2000030054                                                                                                                                                                                                                                                                                                                    | ChiCTR2000029559                                                                                                                                                                                                                                                                                                                                 | ChiCTR2000029992                                                                                                                                                                                                                                                                                                                    | ChiCTR2000029898                                                                                                                                                                                                                                                                                                                                                                                                         |
| Study desing          | Randomised, parallell assigned, open- label, placebo-controlled study                                                                                                                                                                                                                                                               | Singlecentered, randomised, parallell assigned, double-blinded, placebo- controlled study                                                                                                                                                                                                                                                        | Randomised, parallell assigned, open- label, placebo-controlled study                                                                                                                                                                                                                                                               | Randomised, parallell assigned, open- label study                                                                                                                                                                                                                                                                                                                                                                        |
| Status trial          | Not yet recruiting                                                                                                                                                                                                                                                                                                                  | Recruiting                                                                                                                                                                                                                                                                                                                                       | Not yet recruiting                                                                                                                                                                                                                                                                                                                  | Recruiting                                                                                                                                                                                                                                                                                                                                                                                                               |
| Duration/End of study | 3 months/ Estimated May 21, 2020                                                                                                                                                                                                                                                                                                    | 1 month/ Estimated February 29, 2020                                                                                                                                                                                                                                                                                                             | 3 months/ Estimated May 20, 2020                                                                                                                                                                                                                                                                                                    | 2 months/ Estimated April 30, 2020                                                                                                                                                                                                                                                                                                                                                                                       |
| Study details         | Pts: n = 100<br>Location: China<br>Intervention:<br>- Group 1: Hydroxychloroquine Sulfate (0.2 g bid x14 days/day)<br>- Group 2: Chloroquine Phosphate (first dose 1 g x2 days, third day 0.5 g x12 days)<br>Control: Placebo oral tablet<br>Duration of observation: up to 28 days<br>Primary outcome:<br>- Clinical recovery time | Pts: n = 300<br>Location: China<br>Intervention:<br>- Group 1: Hydroxychloroquine (0.1 oral 2/day)<br>- Group 2: Hydroxychloroquine (0.2 oral 2/day)<br>Control: Placebo oral tablet<br>Duration of observation: not given<br>Primary outcome:<br>- T cell recovery time<br>- Time when the nucleic acid of the novel coronavirus turns negative | Pts: n = 100<br>Location: China<br>Intervention:<br>- Group 1: Chloroquine Phosphate (first dose 1 g x2 days, third day 0.5 g x12 days)<br>- Group 2: Hydroxychloroquine Sulfate (0.2 g bid x14 days/day)<br>Control: Placebo oral tablet<br>Duration of observation: up to 28 days<br>Primary outcome:<br>- Clinical recovery time | Pts: n = 100<br>Location: China<br>Intervention:<br>- Group 1: Hydroxychloroquine Sulfate (Day1: first dose: 6 tablets (0.1 g/tablet), second dose: 6 tablets (0.1 g/tablet) after 6h; Day2~5: 2 tablets (0.1 g/tablet), BID)<br>- Group 2: Chloroquine Phosphate (Day 1-3: 500 mg BID; Day 4-5: 250 mg BID)<br>Control: none<br>Duration of observation: up to 28 days<br>Primary outcome: Time to Clinical Improvement |



# Continuación de la tabla.

| Active Substance      | Hydroxychloroquine Sulfate vs. Chloroquin Phosphate                                                                                                                                                                                                                                                                                                                                                                                                         | Hydroxychloroquine Sulfate                                                                                                                                                                                                                                                                               | Hydroxychloroquine Sulfate                                                                                                                                                                                                                                                                                                                                                                                                                                                                                                                                          |
|-----------------------|-------------------------------------------------------------------------------------------------------------------------------------------------------------------------------------------------------------------------------------------------------------------------------------------------------------------------------------------------------------------------------------------------------------------------------------------------------------|----------------------------------------------------------------------------------------------------------------------------------------------------------------------------------------------------------------------------------------------------------------------------------------------------------|---------------------------------------------------------------------------------------------------------------------------------------------------------------------------------------------------------------------------------------------------------------------------------------------------------------------------------------------------------------------------------------------------------------------------------------------------------------------------------------------------------------------------------------------------------------------|
| Sponsor               | Peking University Third Hospital, China                                                                                                                                                                                                                                                                                                                                                                                                                     | Ruijin Hospital, Shanghai Jiaotong University School of Medicine, China                                                                                                                                                                                                                                  | The First Hospital of Peking University, China                                                                                                                                                                                                                                                                                                                                                                                                                                                                                                                      |
| Trial identifier      | ChiCTR2000029899                                                                                                                                                                                                                                                                                                                                                                                                                                            | ChiCTR2000029868                                                                                                                                                                                                                                                                                         | ChiCTR2000029740                                                                                                                                                                                                                                                                                                                                                                                                                                                                                                                                                    |
| Study desing          | Randomised, parallell assigned, open-label study                                                                                                                                                                                                                                                                                                                                                                                                            | Randomised controlled open-label, multicenter trial                                                                                                                                                                                                                                                      | Randomised open-label control clinical trial                                                                                                                                                                                                                                                                                                                                                                                                                                                                                                                        |
| Status trial          | Recruiting                                                                                                                                                                                                                                                                                                                                                                                                                                                  | Completed                                                                                                                                                                                                                                                                                                | Recuriting                                                                                                                                                                                                                                                                                                                                                                                                                                                                                                                                                          |
| Duration/End of study | 2 months/ Estimated April 30, 2020                                                                                                                                                                                                                                                                                                                                                                                                                          | 6 months/ Estimated end of June 2020                                                                                                                                                                                                                                                                     | 1 month/ Estimated end of February 2020                                                                                                                                                                                                                                                                                                                                                                                                                                                                                                                             |
| Study details         | <p>Pts: n = 100</p> <p>Location: China</p> <p>Intervention:</p> <p>- Group 1: Hydroxychloroquine Sulfate (Day1: first dose: 6 tablets (0.1 g/tablet), second dose: 6 tablets (0.1 g/tablet) after 6h; Day2~5: 2 tablets (0.1 g/tablet), BID)</p> <p>- Group 2: Chloroquine Phosphate (Day 1-3: 500 mg BID; Day 4-5: 250 mg BID)</p> <p>Control: none</p> <p>Duration of observation: up to 28 days</p> <p>Primary outcome: Time to Clinical Improvement</p> | <p>Pts:: n = 360</p> <p>Group1:n=180</p> <p>Group2:n=180</p> <p>Location: China</p> <p>Intervention: Oral Hydroxychloroquine Sulfate tablets (group 1)</p> <p>Control: Conventional treatment (group 2)</p> <p>Duration of observation: Not reported</p> <p>Primary outcome: Viral nucleic acid test</p> | <p>Pts: n = 78</p> <p>Group 1: n = 54</p> <p>Group 2: n = 24</p> <p>Location: China</p> <p>Intervention: Oral Hydroxychloroquine Sulfate tablets (group 1)</p> <p>Control: Conventional therapy (group 2)</p> <p>Duration of observation: 4 weeks</p> <p>Primary outcome:</p> <ul style="list-style-type: none"> <li>- Oxygen index</li> <li>- Max respiratory rate</li> <li>- Lung radiography</li> <li>- Count of lymphocyte</li> <li>- Temperature</li> <li>- Other infection</li> </ul> <p>- Time when the nuleic acid of the novel Covid-19 turns negative</p> |
